# Supplementary material for: Mammographic density and ageing: A collaborative pooled analysis of cross-sectional data from 22 countries worldwide
Source: PLoS Med. 2017 Jun 30;14(6):e1002335. doi: 10.1371/journal.pmed.1002335 (PMC5493289; doi:10.1371/journal.pmed.1002335)

All adjusted for BMI, BMI2, HRT use (never, current, former, ever), reader, age at first birth and parity. a) additionally adjusted for age.

Chile excluded from a) and c) as all women premenopausal. Norway, Australia-Greek and Australia-Italian excluded from a) and b) as all women postmenopausal. Turkey excluded from a) as age and menopausal status completely correlated.

**S4 Fig:** Associations of square-root dense area (cm), by population group, with (a) menopausal status, (b) age at pre-menopausal ages and (c) age at post-menopausal ages, meta-combined overall and by low, medium and high breast cancer incidence rate in the source population


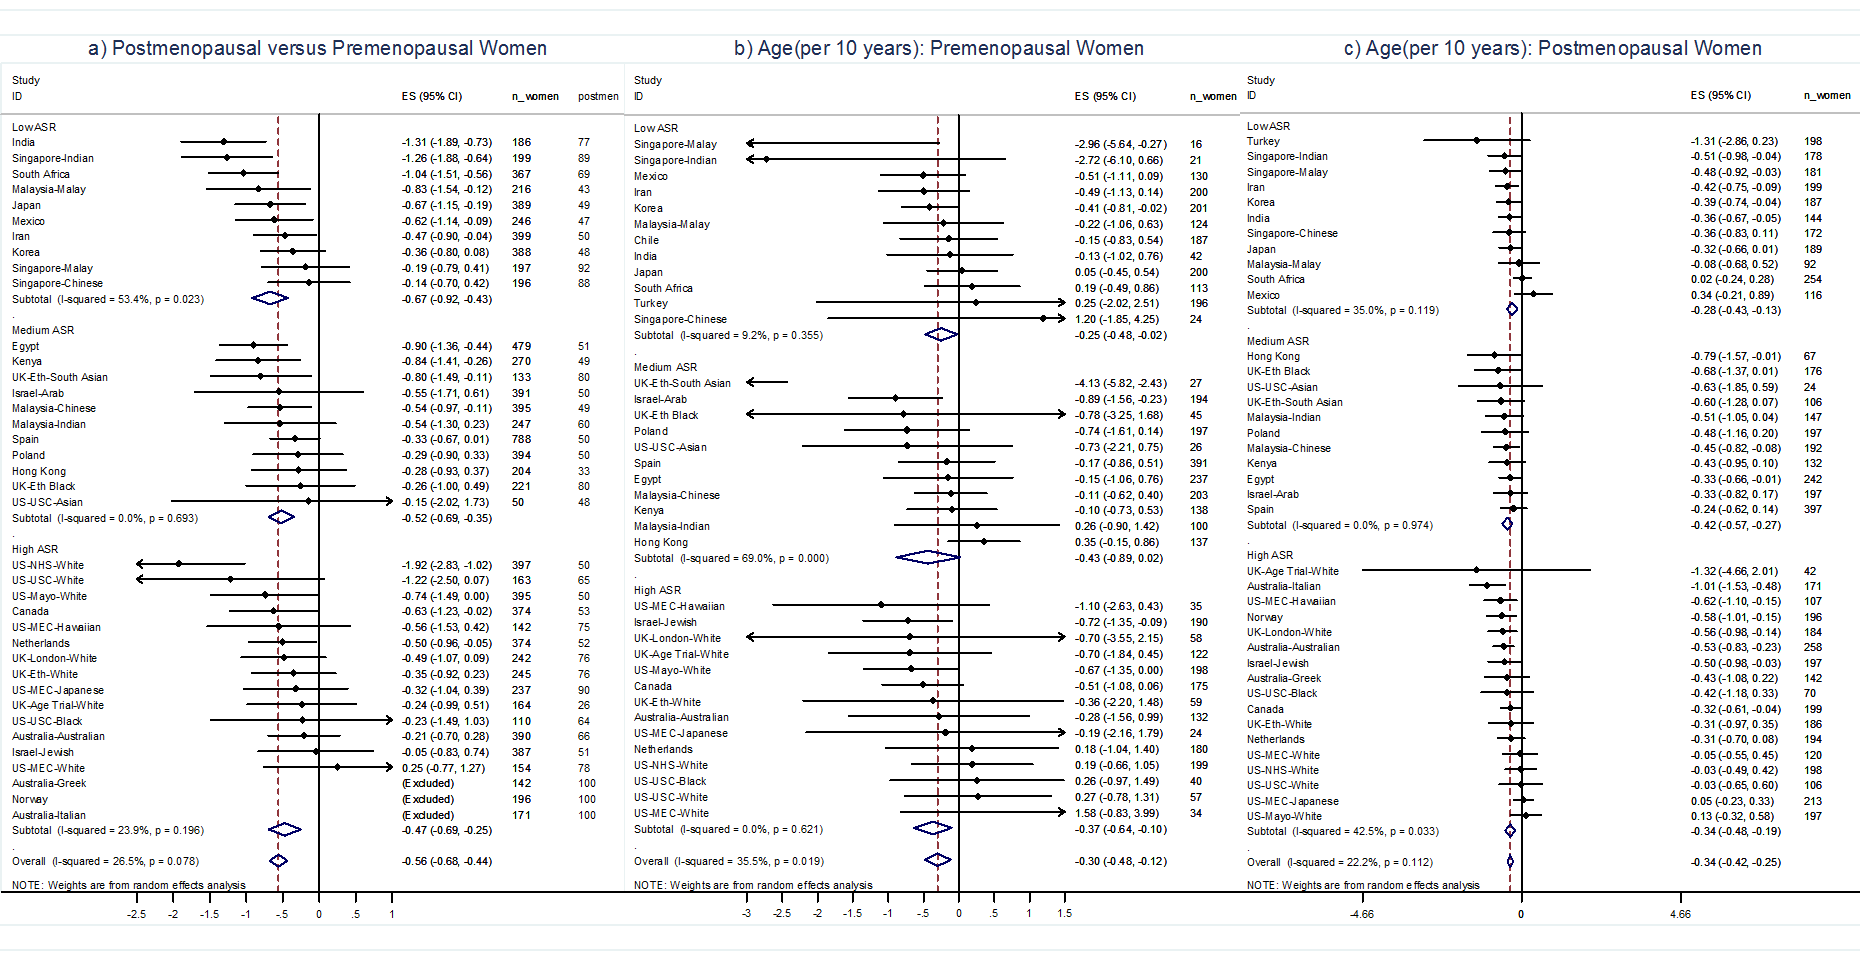

Supplement: S4 Fig — Associations of square-root dense area (cm), by population group, with (a) menopausal status, (b) age in premenopausal women, and (c) age in postmenopausal women, meta-combined overall and by low, medium, and high breast cancer incidence rate in the source population. (DOCX) [file pmed.1002335.s004.docx]
